# Supplementary material for: Highly practical sodium(i)/azobenzene catalyst system for aerobic oxidation of benzylic alcohols
Source: Royal Society of Chemistry journal article supplement (doi:10.1039/c5ra15286k), 2015-01-01
Supplement: c5ra15286k1.pdf [file c5ra15286k1.pdf]

## Supporting information

### Highly Practical Sodium( I )/ Azobenzene Catalyst System for Aerobic Oxidation of benzylic Alcohols

Chengkou Liu,<sup>a</sup> Zheng Fang,<sup>a</sup> Zhao Yang,<sup>b</sup> Qingwen Li,<sup>a</sup> Shiyu Guo,<sup>a</sup> and Kai Guo<sup>a,c,\*</sup>

<sup>a</sup>College of Biotechnology and Pharmaceutical Engineering Nanjing Tech University 30 Puzhu South Road, Nanjing, 211816, China

<sup>b</sup>College of Engineering China Pharmaceutical University, 24 Tongjiiaxiang, NanJing, 210003, China

<sup>c</sup>State Key Laboratory of Materials-Oriented Chemical Engineering Nanjing Tech University, 30 Puzhu South Road, Nanjing, 211816, China

#### Table of Contents:

- 1, General Remarks
- 2, Table S1: The equivalent of NaBr screening
- 3, General procedure for the oxidation of benzylic alcohols to ketones and aldehydes
- 4, General procedure for the oxidation of benzylic 1° alcohols to acids
- 5, Characterization Data of the products
- 6, <sup>1</sup>H spectra
- 7, References

## 1, General Remarks

Reagents and solvents: Commercially available reagents were used without any further purification. All organic solvents were of reagent grade quality without any further purification.

Chromatography: Flash column chromatography was performed using Silicycle silica gel (200-300 mesh). Analytical thin-layer chromatography (TLC) was performed on 0.2 mm coated silica gel plates (HSGF 254) and visualized using a UV lamp (254 nm or 365 nm).

Nuclear Magnetic Resonance Spectroscopy:  $^1\text{H}$  NMR was recorded on magnet system 400'54 ascend purchased from Bruker Biospin AG.  $^1\text{H}$  NMR spectra chemical shifts ( $\delta$ ) are reported in parts per million (ppm) referenced to TMS (0 ppm). Data are reported as follows: chemical shift, multiplicity (s = singlet, d = doublet, t = triplet, q = quartet, dd = doublet of doublets, dt = doublet of triplets, ddt = doublet of doublet of triplets, dtd = doublet of triplet of doublets, m = multiplet, br = broad), coupling constant (J) in Hertz (Hz), and integration.

## 2, Table S1: The equivalent of NaBr screening

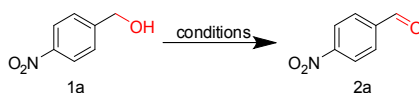

| Entry | Catalyst (mol%) | Co-catalyst (equiv.) | T (°C) | Solvent     | T(h) | Yield (%) |
|-------|-----------------|----------------------|--------|-------------|------|-----------|
| 1     | Azobenzene(5)   | NaBr(0.2)            | 80     | 1,4-Dioxane | 48   | trace     |
| 2     | Azobenzene(5)   | NaBr(0.5)            | 80     | 1,4-Dioxane | 48   | 10        |
| 3     | Azobenzene(5)   | NaBr(1)              | 80     | 1,4-Dioxane | 48   | 38        |
| 4     | Azobenzene(5)   | NaBr(2)              | 80     | 1,4-Dioxane | 48   | 88        |
| 5     | Azobenzene(5)   | NaBr(3)              | 80     | 1,4-Dioxane | 48   | 92        |

## 3, General procedure for the oxidation of benzylic alcohols to ketones and aldehydes

The specific benzylic alcohols (1 mmol, 1.0 eq) and sodium bromide (2 mmol, 2 eq) were dissolved in dioxane (3 mL), then azobenzene (0.05 mmol, 0.05 eq) was added to the reaction mixture and stirred for a certain time in a preheated oil bath at 80°C under O<sub>2</sub> atmosphere (O<sub>2</sub> balloon). The reaction mixtures were diluted with ethyl acetate and washed with brine and water. The separated organic layers were dried over by anhydrous Na<sub>2</sub>SO<sub>4</sub> and filtered. The filtrate was concentrated under reduced pressure and the residue was chromatographed on silica gel using hexane/ethyl acetate to afford the desired product.

## 4, General procedure for the oxidation of benzylic 1° alcohols to acids

The specific benzylic 1° alcohols (1 mmol, 1.0 eq) and sodium hydroxide (2 mmol, 2 eq) were dissolved in dioxane (3 mL). Then, azobenzene (0.05 mmol, 0.05 eq) was added to the reaction mixture and stirred for a certain time in a preheated oil bath at 80°C under O<sub>2</sub> atmosphere (O<sub>2</sub> balloon). The reaction mixtures were diluted with H<sub>2</sub>O and regulated the pH to 1-2 by hydrochloric acid (10%, aq). The product was extracted by ethyl acetate or dichloromethane from the solution before. The separated organic layers were dried over by anhydrous Na<sub>2</sub>SO<sub>4</sub> and filtered. The filtrate was concentrated under reduced pressure and the residue was chromatographed on silica gel using hexane/ethyl acetate or dichloromethane/methanol to afford the desired product.

Benzoic acid (3a), p-toluic acid (3e), 2-furoic acid (3f), 2-thiophenecarboxylic acid (3g)

The specific benzylic 1° alcohols (1 mmol, 1.0 eq) and sodium hydroxide (2 mmol, 2 eq) were dissolved in dioxane (3 mL). Then, azobenzene (0.05 mmol, 0.05 eq) was added to the reaction mixture and stirred for a certain time in a preheated oil bath at 80°C under O<sub>2</sub> atmosphere (O<sub>2</sub> balloon). The reaction mixtures were diluted with H<sub>2</sub>O and regulated the pH to 1-2 by hydrochloric acid (10%, aq). The product was extracted by ethyl acetate from the solution before. The separated organic layers were dried over by anhydrous Na<sub>2</sub>SO<sub>4</sub> and filtered. The filtrate was concentrated under reduced pressure and the residue was chromatographed on silica gel using hexane/ethyl acetate (2:1) to afford the desired product.

p-Nitrobenzoic acid (3b), 4-Chlorobenzoic acid (3c), 4-Bromobenzoic acid (3d)

The specific benzylic 1° alcohols (1 mmol, 1.0 eq) and sodium hydroxide (2 mmol, 2 eq) were dissolved in dioxane (3 mL). Then, azobenzene (0.05 mmol, 0.05 eq) was added to the reaction mixture and stirred for a certain time in a preheated oil bath at 80°C under O<sub>2</sub> atmosphere (O<sub>2</sub> balloon). The reaction mixtures were diluted with H<sub>2</sub>O and regulated the pH to 1-2 by hydrochloric acid (10%, aq). The product was extracted by dichloromethane from the solution before. The separated organic layers were dried over by anhydrous Na<sub>2</sub>SO<sub>4</sub> and filtered. The filtrate was concentrated under reduced pressure and the residue was chromatographed on silica gel using dichloromethane/methanol (30:1) to afford the desired product.

Nicotinic acid (3h)

3-Pyridinemethanol (1 mmol, 1.0 eq) and sodium hydroxide (2 mmol, 2 eq) were dissolved in dioxane (3 mL). Then, azobenzene (0.05 mmol, 0.05 eq) was added to the reaction mixture and stirred for a certain time in a preheated oil bath at 80°C under O<sub>2</sub> atmosphere (O<sub>2</sub> balloon). The reaction mixtures were diluted with H<sub>2</sub>O and regulated the pH to 3-4 by hydrochloric acid (10%, aq). The product was extracted by dichloromethane from the solution before. The separated organic layers were dried over by anhydrous Na<sub>2</sub>SO<sub>4</sub> and filtered. The filtrate was concentrated under reduced pressure and the residue was chromatographed on silica gel using dichloromethane/methanol (10:1) to afford the desired product.

## 5, Characterization Data of the products

All the products were characterized by  $^1\text{H}$  NMR spectroscopy and compared with literature reported data.

#### Anisic aldehyde

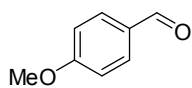

$^1\text{H}$  NMR (400 MHz,  $\text{CDCl}_3$ )  $\delta$  9.79 (s, 1H), 7.77 – 7.72 (m, 2H), 6.94 – 6.89 (m, 2H), 3.79 (s, 3H). Spectral data are in accordance with the literature report.<sup>[1-2]</sup>

#### 4-Chlorobenzaldehyde

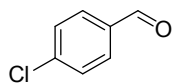

$^1\text{H}$  NMR (400 MHz,  $\text{CDCl}_3$ )  $\delta$  9.91 (s, 1H), 7.78 – 7.76 (m, 1H), 7.75 – 7.74 (m, 1H), 7.47 – 7.45 (m, 1H), 7.45 – 7.43 (m, 1H). Spectral data are in accordance with the literature report.<sup>[1]</sup>

#### 4'-Chloroacetophenone

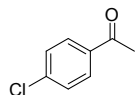

$^1\text{H}$  NMR (400 MHz,  $\text{CDCl}_3$ )  $\delta$  7.84 – 7.82 (m, 1H), 7.81 – 7.80 (m, 1H), 7.38 – 7.36 (m, 1H), 7.35 – 7.34 (m, 1H), 2.51 (s, 3H).

#### 4-Bromobenzaldehyde

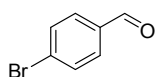

$^1\text{H}$  NMR (400 MHz,  $\text{CDCl}_3$ )  $\delta$  9.91 (s, 1H), 7.68 (d,  $J$  = 8.3 Hz, 2H), 7.62 (d,  $J$  = 8.3 Hz, 2H).

#### Benzophenone

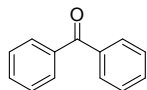

$^1\text{H}$  NMR (400 MHz,  $\text{CDCl}_3$ )  $\delta$  7.84 – 7.78 (m, 4H), 7.62 – 7.56 (m, 2H), 7.52 – 7.46 (m, 4H). Spectral data are in accordance with the literature report.<sup>[2]</sup>

#### 2, 6-Dichlorobenzaldehyde.

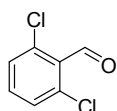

$^1\text{H}$  NMR (400 MHz,  $\text{CDCl}_3$ )  $\delta$  10.43 (s, 1H), 7.33 (s, 3H). Spectral data are in accordance with the literature report.<sup>[1]</sup>

#### Furfural

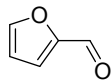

$^1\text{H}$  NMR (400 MHz,  $\text{CDCl}_3$ )  $\delta$  9.59 (s, 1H), 7.64 – 7.62 (m, 1H), 7.19 (dd,  $J$  = 3.6, 0.5 Hz, 1H), 6.54 (dd,  $J$  = 3.6, 2 Hz, 1H). Spectral data are in accordance with the literature report.<sup>[3]</sup>

#### 2-Acetylthiophene

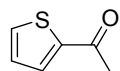

$^1\text{H}$  NMR (400 MHz,  $\text{CDCl}_3$ )  $\delta$  7.63 (dd,  $J$  = 3.8, 1.1 Hz, 1H), 7.57 (dd,  $J$  = 5.0, 1.1 Hz, 1H), 7.06 (dd,  $J$  = 4.9, 3.8 Hz, 1H), 2.50 (s, 3H). Spectral data are in accordance with the literature report.<sup>[3]</sup>

#### 3-Acetylpyridine

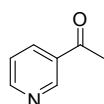

$^1\text{H}$  NMR (400 MHz,  $\text{CDCl}_3$ )  $\delta$  9.09 (d,  $J$  = 2.1 Hz, 1H), 8.71 (dd,  $J$  = 4.8, 1.6 Hz, 1H), 8.16 (dt,  $J$  = 8.0, 2.0 Hz, 1H), 7.36 (dd,  $J$  = 8.0, 4.8 Hz, 1H), 2.57 (s, 3H). Spectral data are in accordance with the literature report.<sup>[4]</sup>

### Benzaldehyde

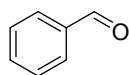

$^1\text{H}$  NMR (400 MHz,  $\text{CDCl}_3$ )  $\delta$  9.94 (s, 1H), 7.83 – 7.78 (m, 2H), 7.58 – 7.53 (m, 1H), 7.45 (t,  $J$  = 7.6 Hz, 2H). Spectral data are in accordance with the literature report.<sup>[1]</sup>

### 2-Chlorobenzaldehyde

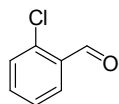

$^1\text{H}$  NMR (400 MHz,  $\text{CDCl}_3$ )  $\delta$  10.41 (s, 1H), 7.84 (dd,  $J$  = 7.7, 1.7 Hz, 1H), 7.48 – 7.43 (m, 1H), 7.37 (dd,  $J$  = 8.0, 0.9 Hz, 1H), 7.31 (t,  $J$  = 7.5 Hz, 1H).

### m-Tolualdehyde

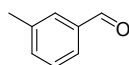

$^1\text{H}$  NMR (400 MHz,  $\text{CDCl}_3$ )  $\delta$  9.89 (s, 1H), 7.58 (m, 2H), 7.37 – 7.30 (m, 2H), 2.33 (s, 3H).

### 3-Chlorobenzaldehyde

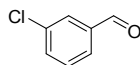

$^1\text{H}$  NMR (400 MHz,  $\text{CDCl}_3$ )  $\delta$  9.90 (s, 1H), 7.77 (t,  $J$  = 1.6 Hz, 1H), 7.69 (dt,  $J$  = 7.6, 1.3 Hz, 1H), 7.52 (ddd,  $J$  = 8.0, 2.4, 1.2 Hz, 1H), 7.41 (t,  $J$  = 7.8 Hz, 1H).

### p-Tolualdehyde

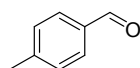

$^1\text{H}$  NMR (400 MHz,  $\text{CDCl}_3$ )  $\delta$  9.88 (s, 1H), 7.69 (d,  $J$  = 8.1 Hz, 2H), 7.25 (d,  $J$  = 7.9 Hz, 2H), 2.36 (s, 3H). Spectral data are in accordance with the literature report.<sup>[1]</sup>

### Acetophenone

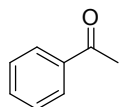

$^1\text{H}$  NMR (400 MHz,  $\text{CDCl}_3$ )  $\delta$  7.88 (dt,  $J$  = 8.5, 1.7 Hz, 2H), 7.51 – 7.45 (m, 1H), 7.41 – 7.35 (m, 2H), 2.52 (s, 3H). Spectral data are in accordance with the literature report.<sup>[1]</sup>

### 4-Fluoroacetophenone

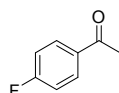

$^1\text{H}$  NMR (400 MHz,  $\text{CDCl}_3$ )  $\delta$  7.93 – 7.87 (m, 2H), 7.04 (m, 2H), 2.51 (s, 3H).

### 2-Acetylfuran

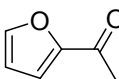

$^1\text{H}$  NMR (400 MHz,  $\text{CDCl}_3$ )  $\delta$  7.53 – 7.51 (m, 1H), 7.12 (dd,  $J$  = 3.5, 0.8 Hz, 1H), 6.47 (dd,  $J$  = 3.5, 1.7 Hz, 1H), 2.41 (s, 3H). Spectral data are in accordance with the literature report.<sup>[3]</sup>

### 2-Thenaldehyde

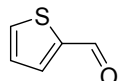

$^1\text{H}$  NMR (400 MHz,  $\text{CDCl}_3$ )  $\delta$  9.87 (d,  $J$  = 1.2 Hz, 1H), 7.73 – 7.68 (m, 2H), 7.14 (dd,  $J$  = 4.8, 3.8 Hz, 1H). Spectral data are in accordance with the literature report.<sup>[2]</sup>

### 3-Pyridinecarboxaldehyde

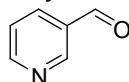

$^1\text{H}$  NMR (400 MHz,  $\text{CDCl}_3$ )  $\delta$  10.06 (s, 1H), 9.02 (dd,  $J$  = 1.6 Hz, 0.4 Hz, 1H), 8.78 (dd,  $J$  = 4.8, 1.6 Hz, 1H), 8.11 (dt,  $J$  = 7.9, 2.0 Hz, 1H), 7.43 (dd,  $J$  = 7.9, 4.8 Hz, 1H). Spectral data are in accordance with the literature report.<sup>[1]</sup>

#### 1-Tetralone

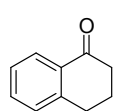

$^1\text{H NMR}$  (400 MHz,  $\text{CDCl}_3$ )  $\delta$  7.95 (d,  $J = 7.6$  Hz, 1H), 7.38 (td,  $J = 7.5, 1.3$  Hz, 1H), 7.22 (t,  $J = 7.6$  Hz, 1H), 7.17 (t,  $J = 6.4$  Hz, 1H), 2.88 (t,  $J = 6.1$  Hz, 2H), 2.61 – 2.53 (t,  $J = 6$  Hz, 2H), 2.10 – 2.01 (m, 2H).

#### 1-Acetyl-4-formylbenzene

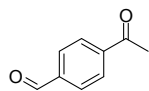

$^1\text{H NMR}$  (400 MHz,  $\text{CDCl}_3$ )  $\delta$  10.04 (s, 1H), 8.04 (d,  $J = 8.3$  Hz, 2H), 7.93 – 7.90 (m, 2H), 2.60 (s, 3H).

#### 4-Bromobenzoic acid

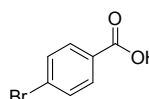

$^1\text{H NMR}$  (400 MHz,  $\text{CDCl}_3$ )  $\delta$  7.91 – 7.87 (m, 2H), 7.57 – 7.53 (m, 2H).

#### Benzoic acid

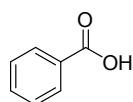

$^1\text{H NMR}$  (400 MHz,  $\text{CDCl}_3$ )  $\delta$  8.06 (dd,  $J = 8.2, 1.1$  Hz, 2H), 7.58 – 7.52 (m, 1H), 7.41 (t,  $J = 7.7$  Hz, 2H).

#### 2-Furoic acid

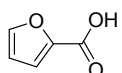

$^1\text{H NMR}$  (400 MHz,  $\text{CDCl}_3$ )  $\delta$  9.81 (s, 1H), 7.59 – 7.57 (m, 1H), 7.28 – 7.26 (m, 1H), 6.50 (dd,  $J = 3.5, 1.7$  Hz, 1H).

#### 4-Chlorobenzoic acid

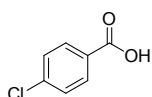

$^1\text{H NMR}$  (400 MHz,  $\text{CDCl}_3$ )  $\delta$  7.97 (d,  $J = 8.4$  Hz, 2H), 7.39 (d,  $J = 8.4$  Hz, 2H).

#### p-Toluic acid

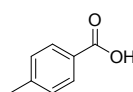

$^1\text{H NMR}$  (400 MHz,  $\text{CDCl}_3$ )  $\delta$  7.94 (d,  $J = 8.1$  Hz, 2H), 7.20 (d,  $J = 8.2$  Hz, 2H), 2.36 (s, 3H).

#### p-Nitrobenzoic acid

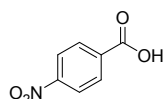

$^1\text{H NMR}$  (400 MHz,  $\text{CDCl}_3$ )  $\delta$  8.26 (m 2H), 8.23 – 8.19 (m, 2H).

## 6, <sup>1</sup>H spectra

Yu-1  
Yu-1

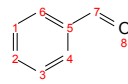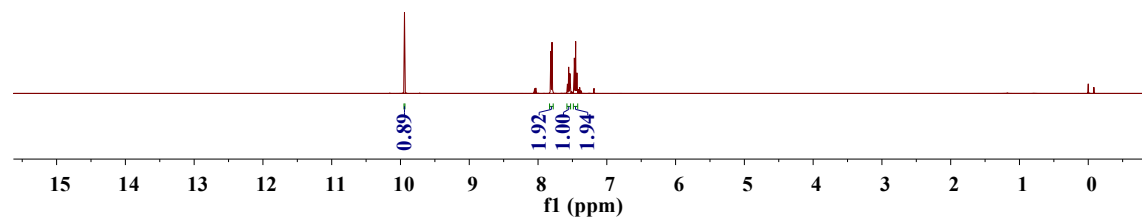

Yu-2  
Yu-2

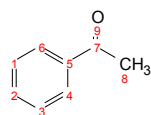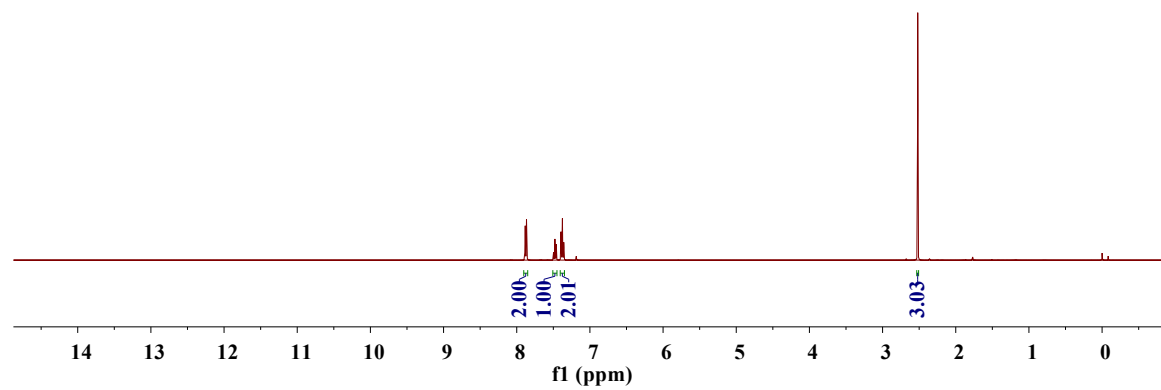

Yu-3  
Yu-3

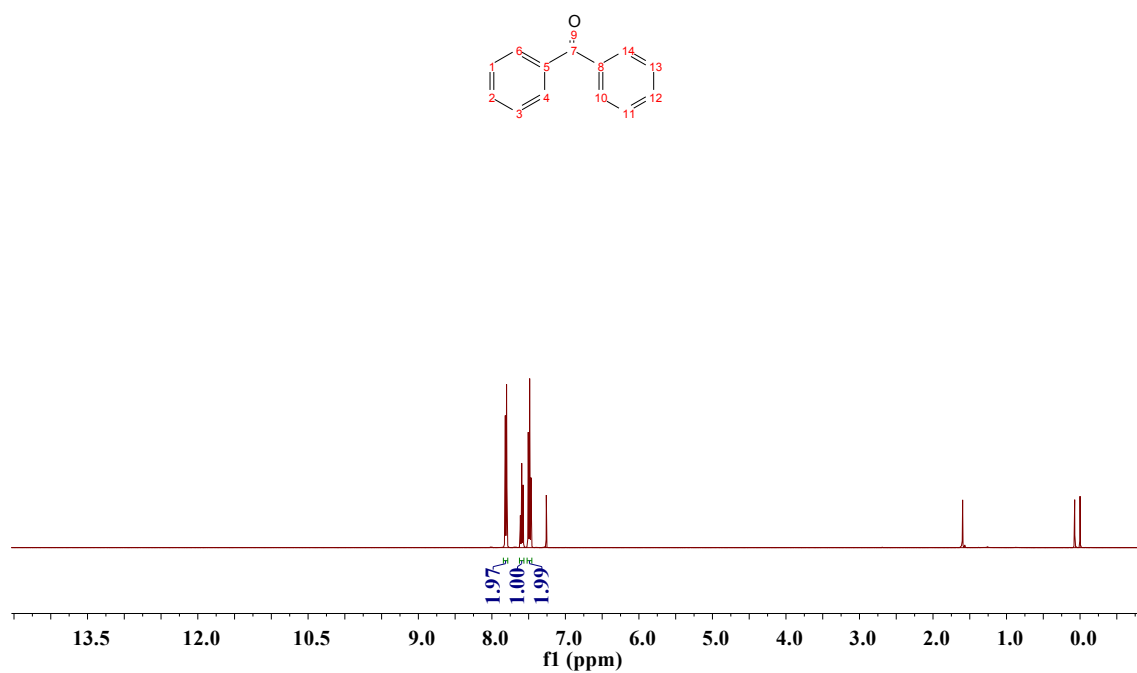

Yu-4  
Yu-4

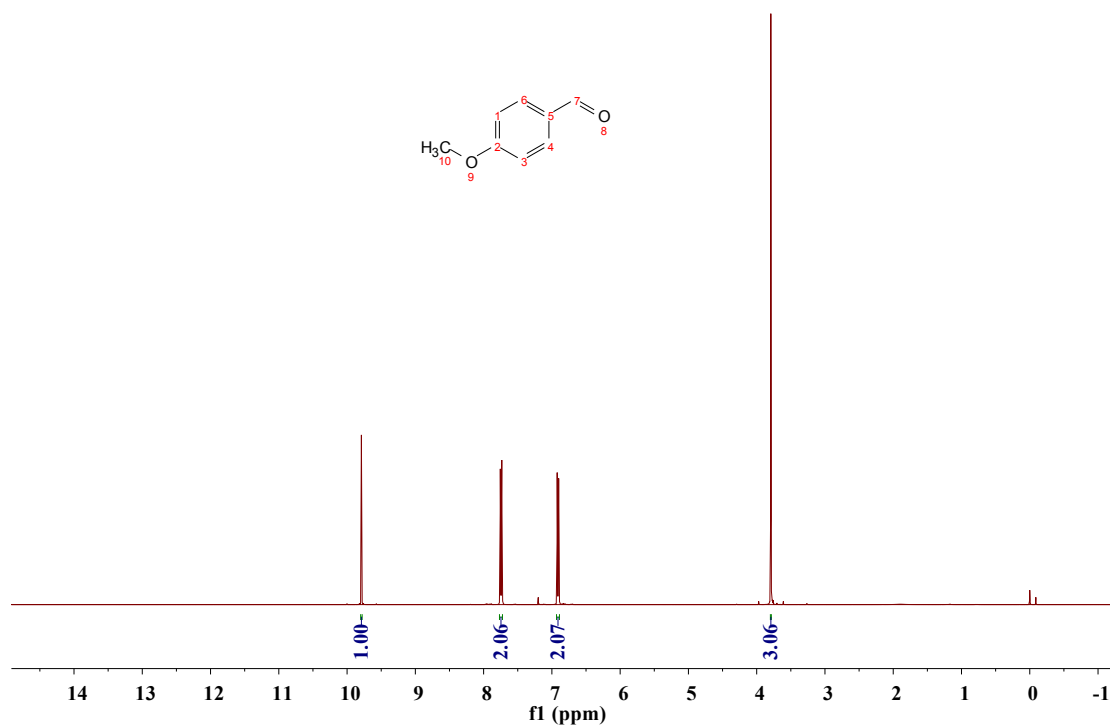

Yu-5  
Yu-5

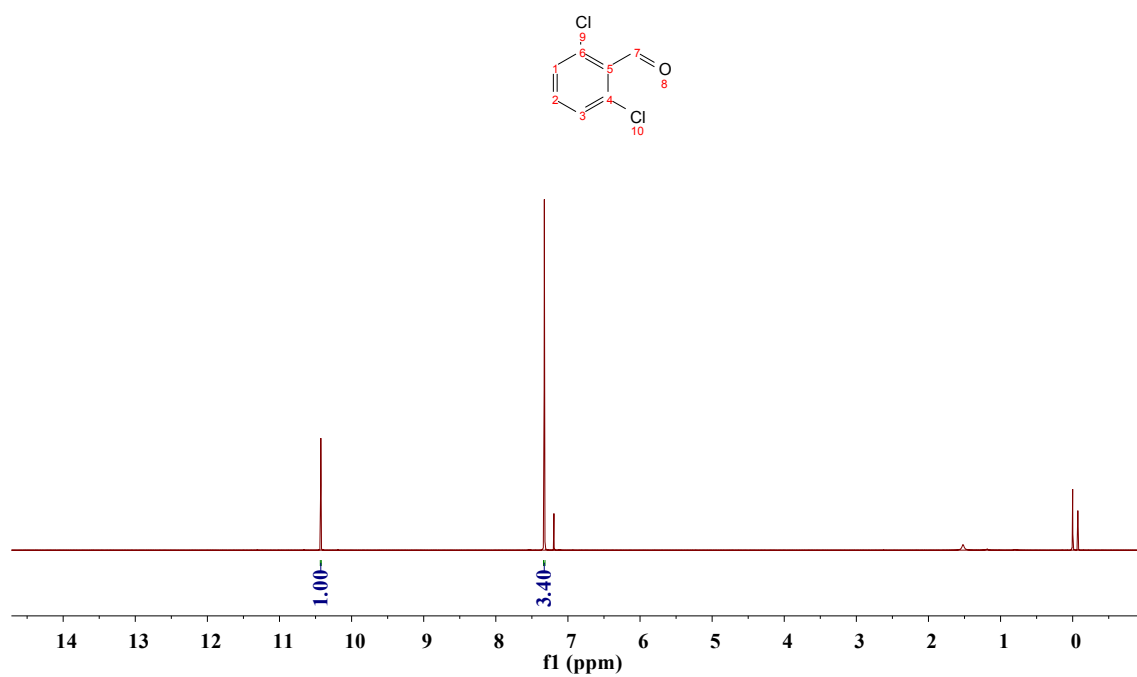

Yu-6  
Yu-6

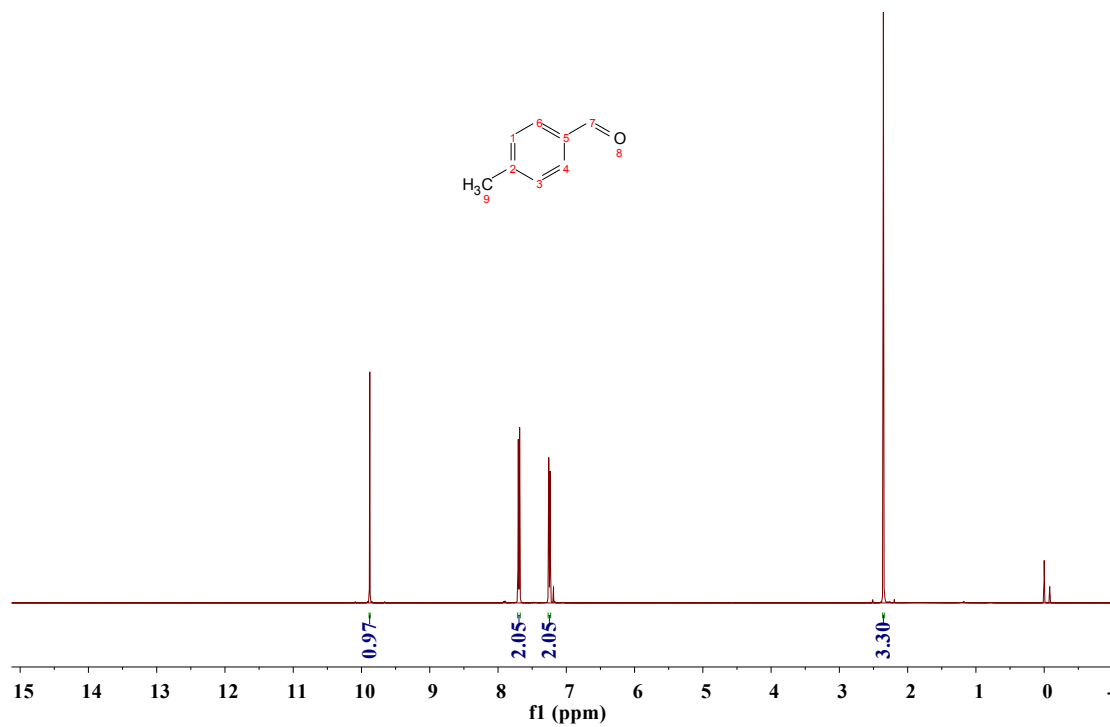

Yu-7  
Yu-7

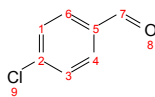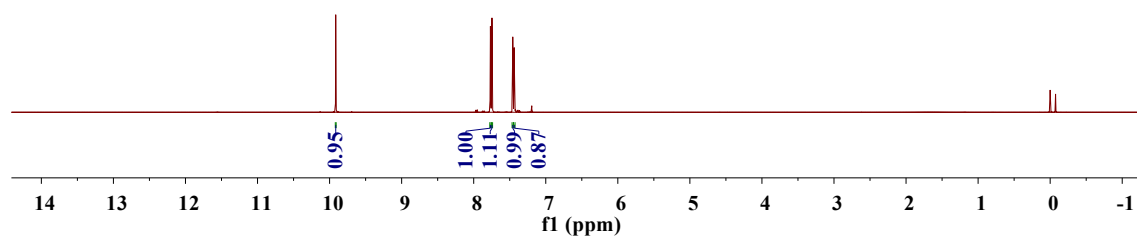

Yu-8  
Yu-8

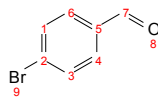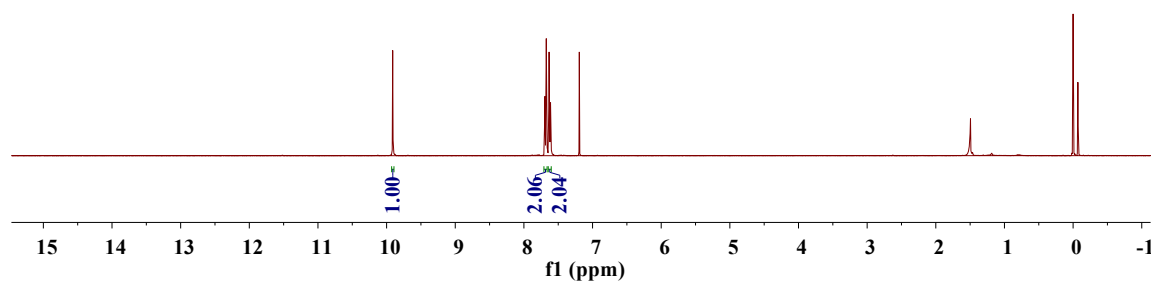

Yu-9  
Yu-9

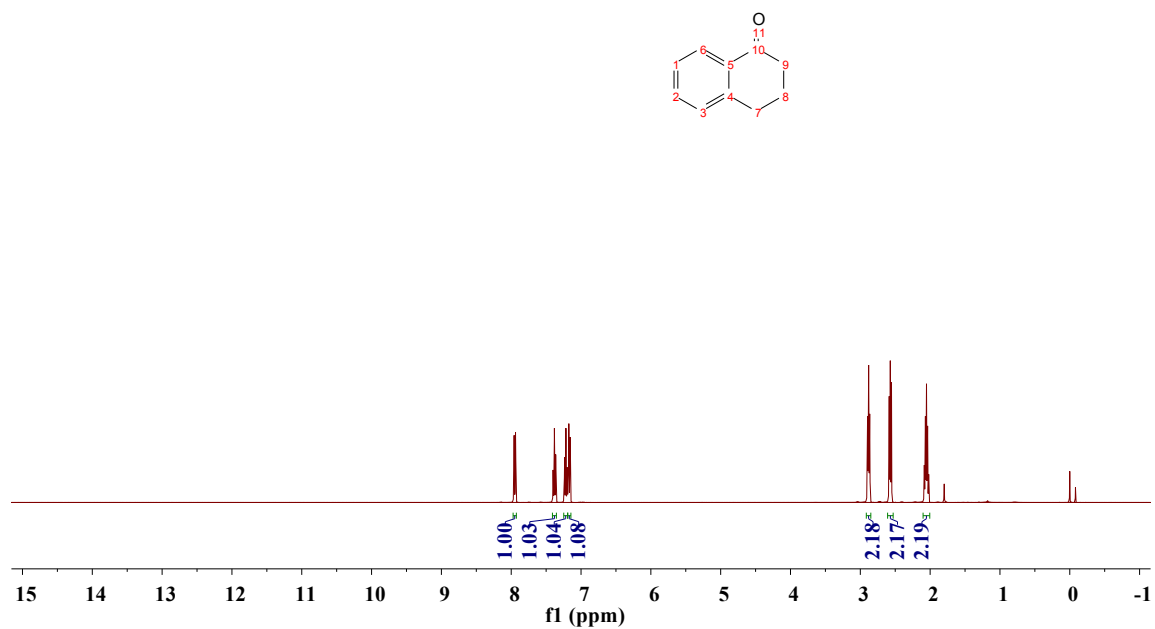

YH-11  
YH-11

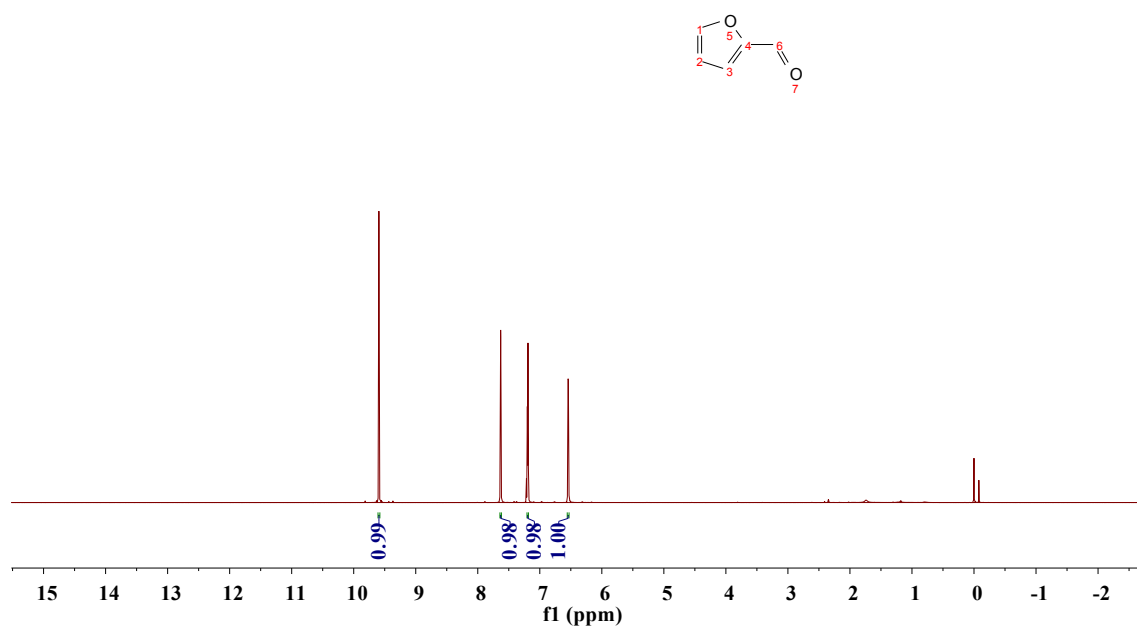

YH-12  
YH-12

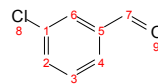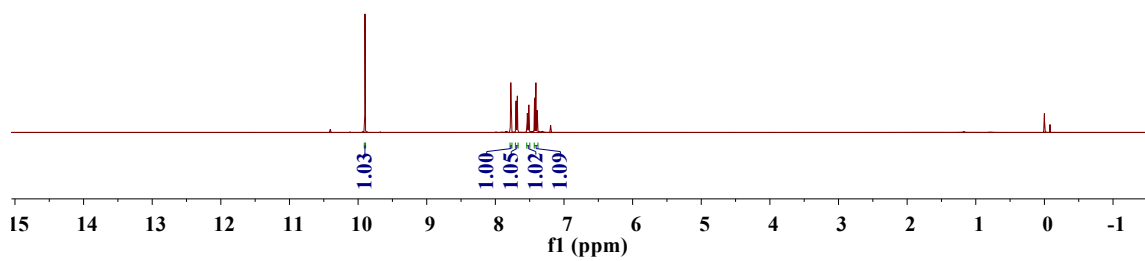

YH-13  
YH-13

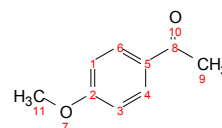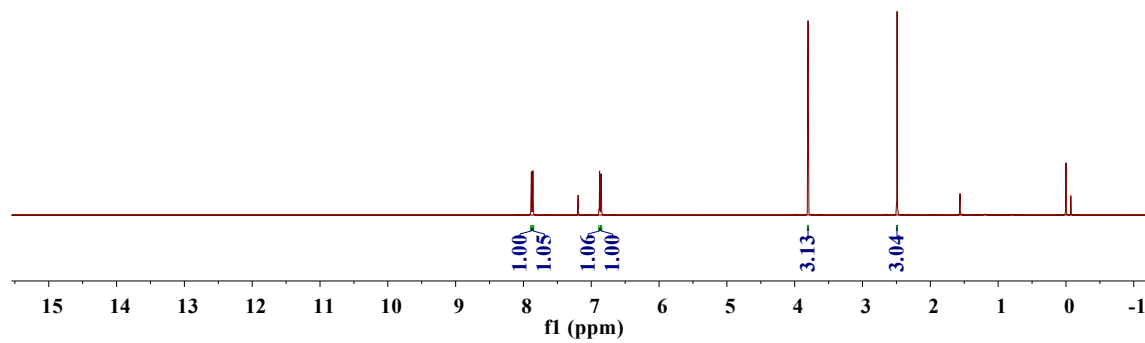

YH-14  
YH-14

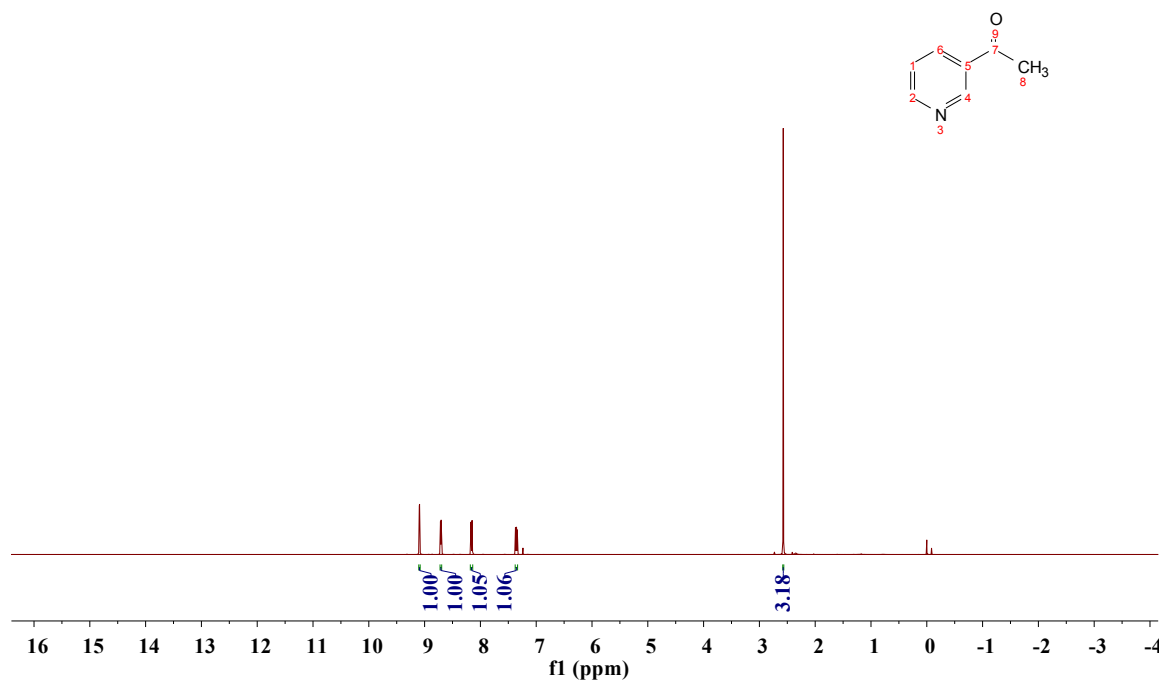

YH-15  
YH-15

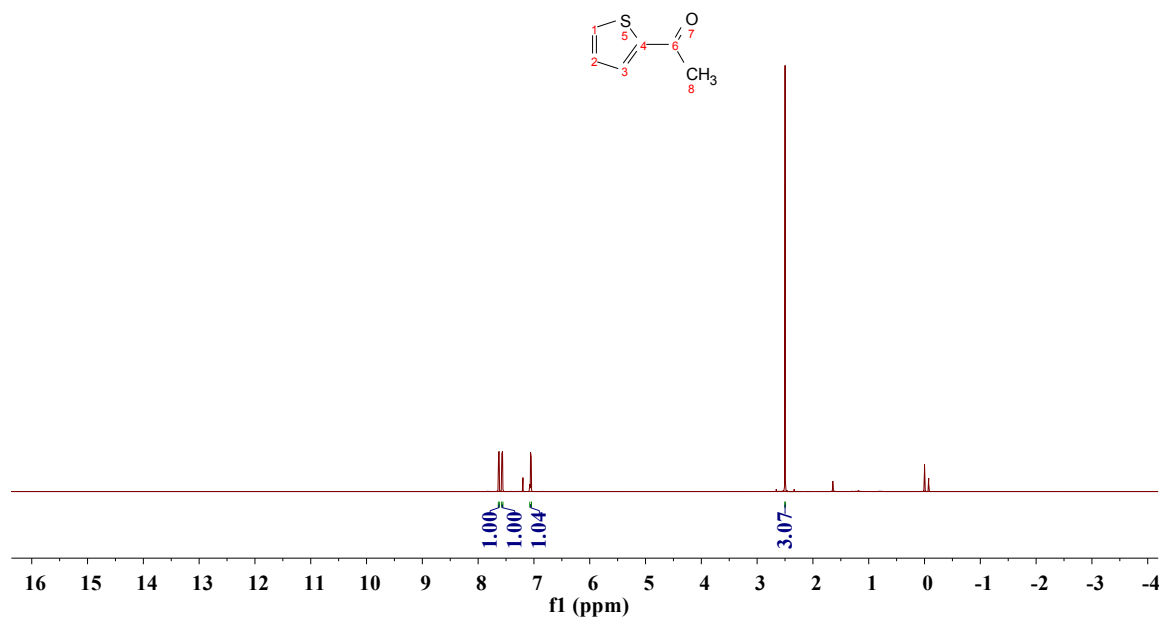

YH-16  
YH-16

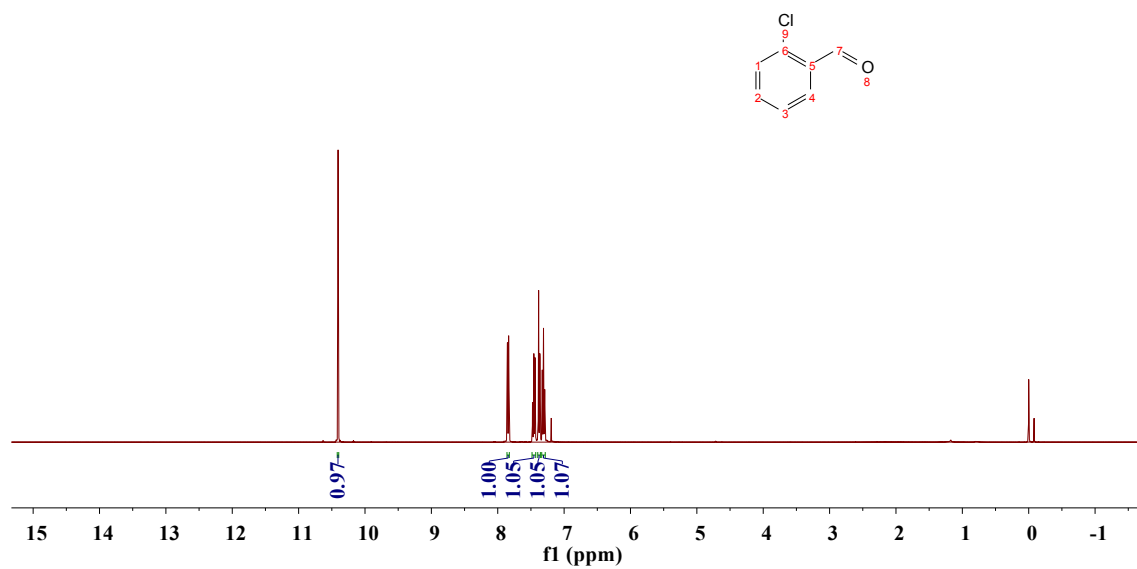

YH-17  
YH-17

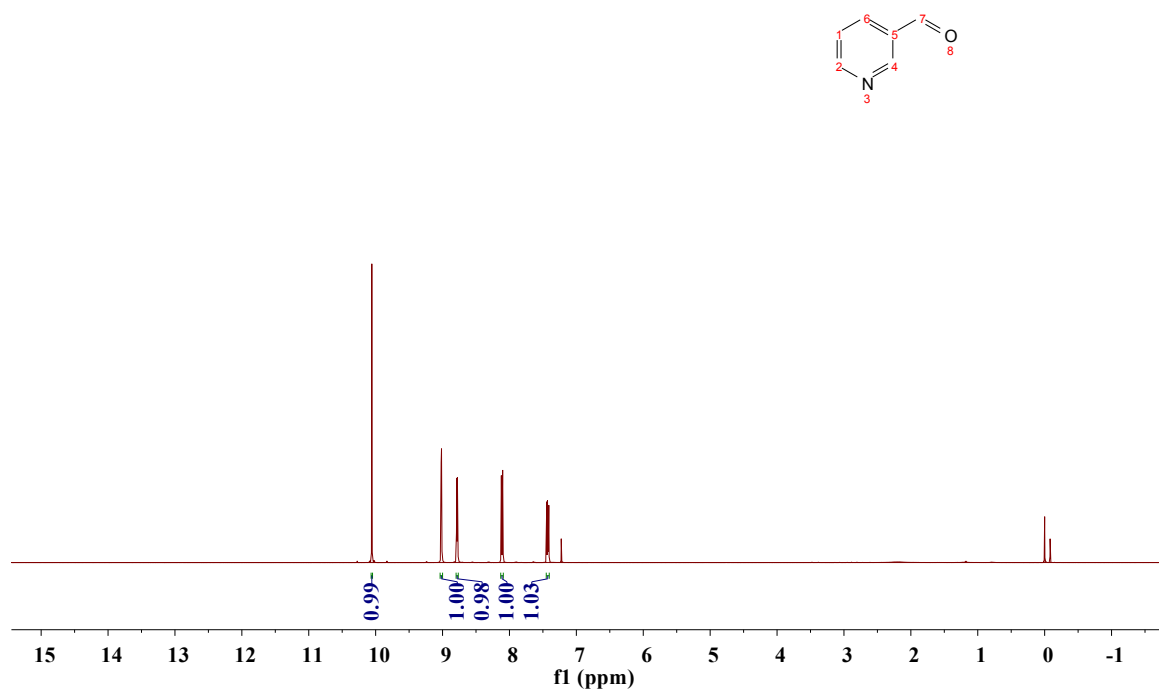

YH-18  
YH-18

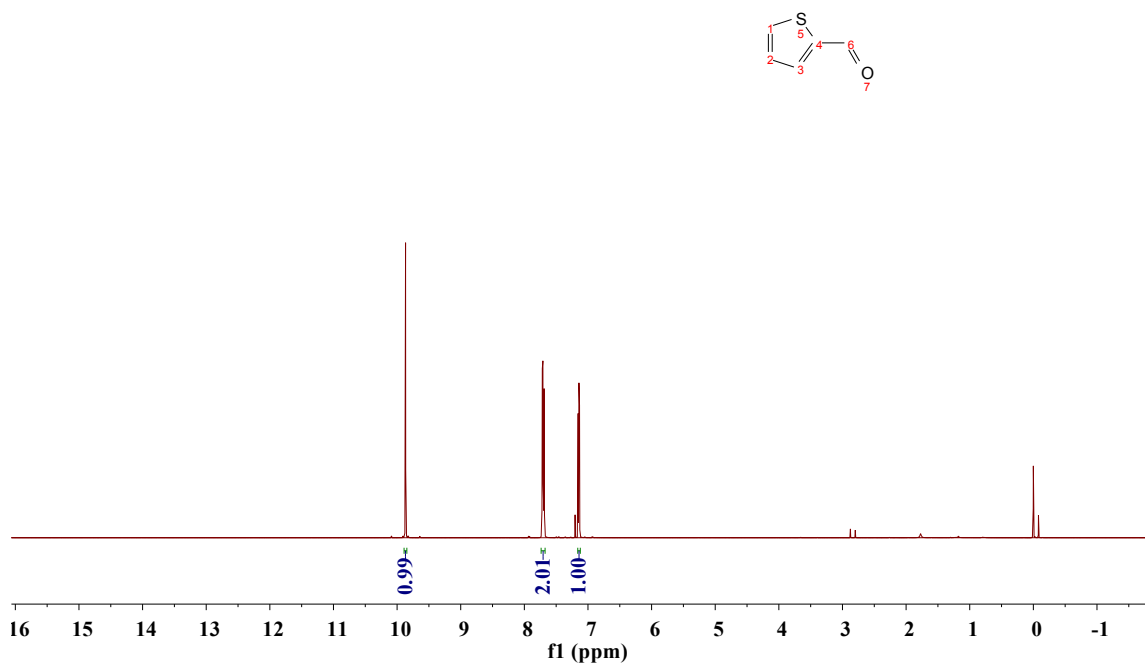

YH-19  
YH-19

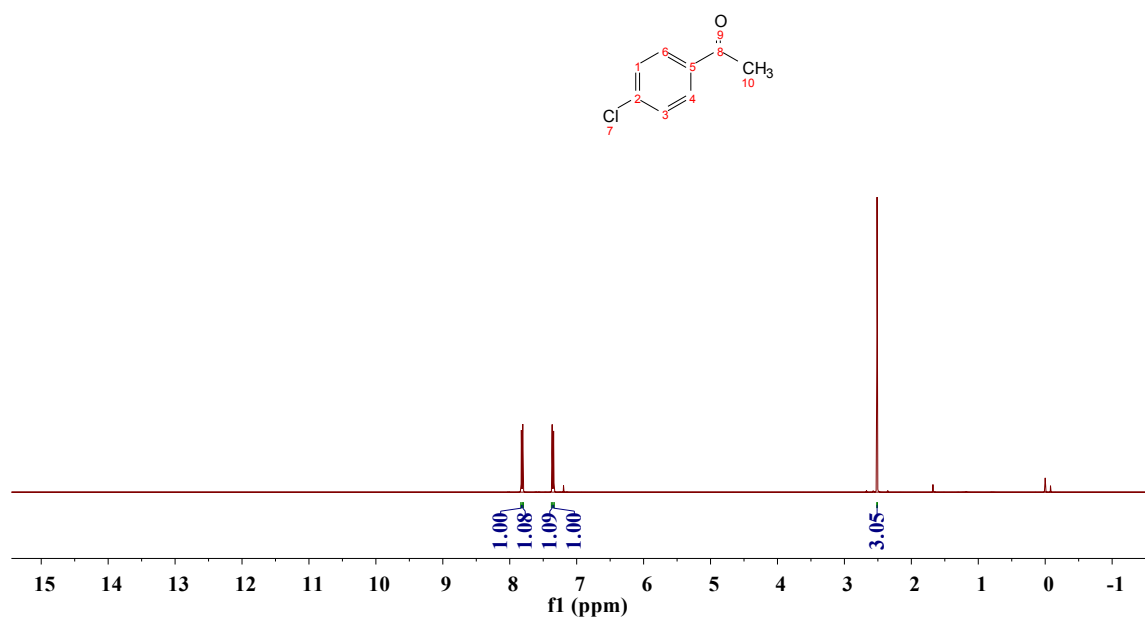

YH-20  
YH-20

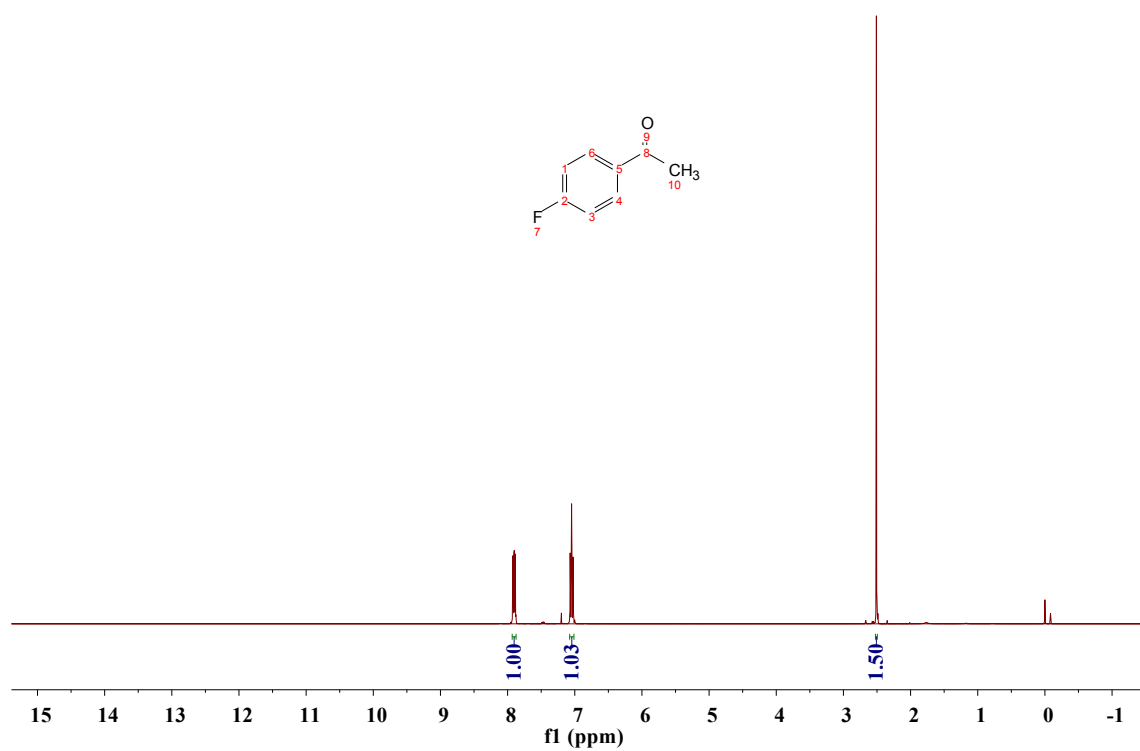

YH-21  
YH-21

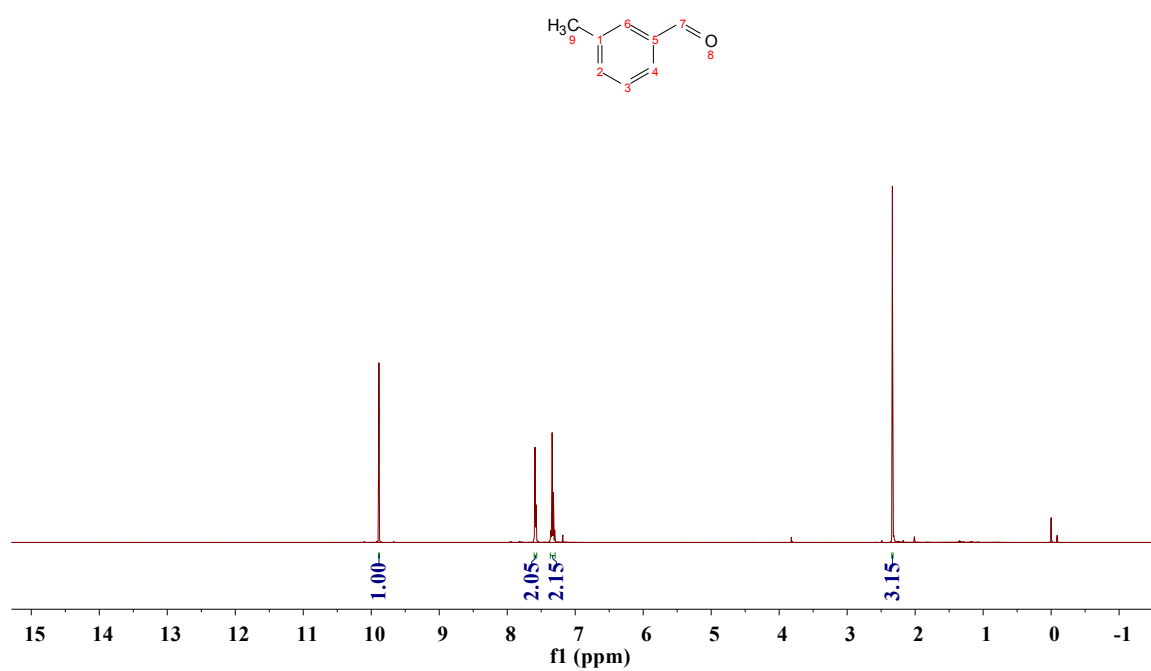

YH-22  
YH-22

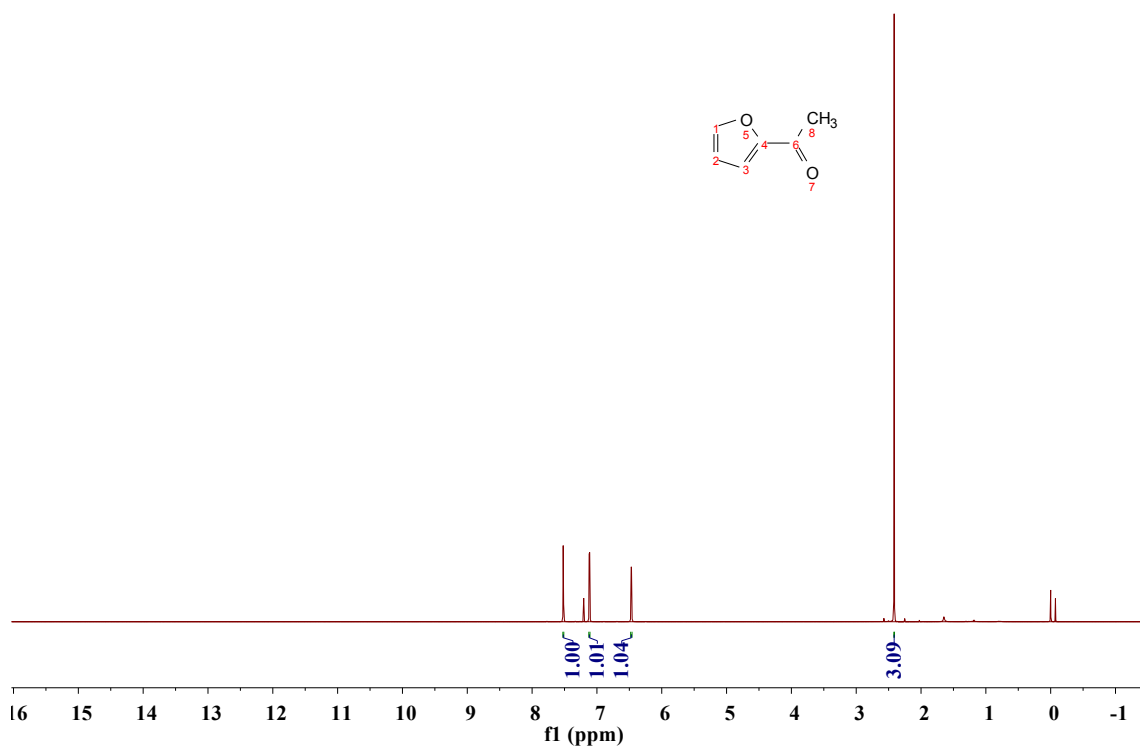

YH-23  
YH-23

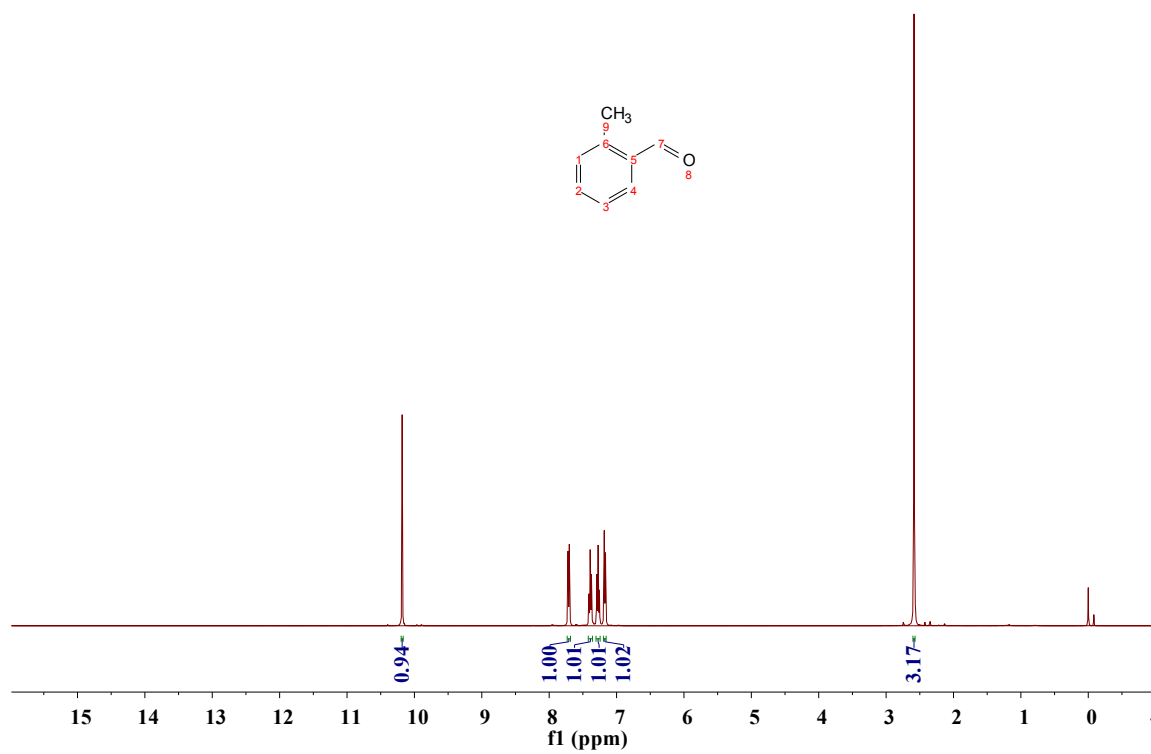

LQW-9  
LQW-9

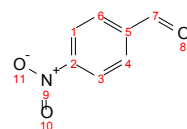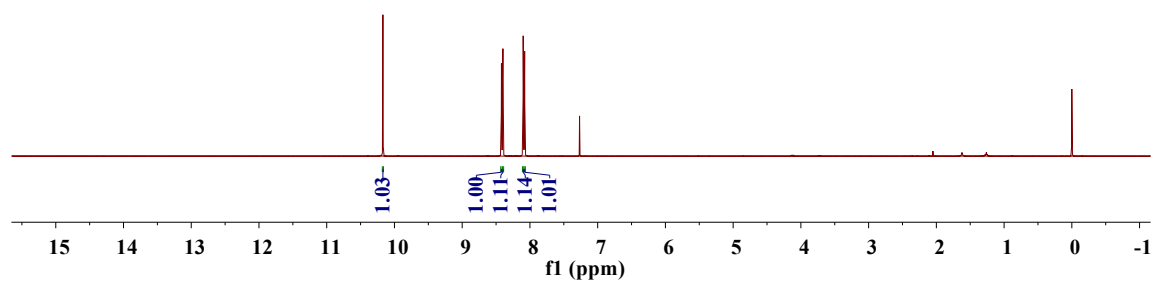

LQW-13  
LQW-13

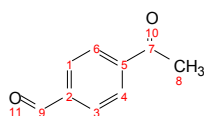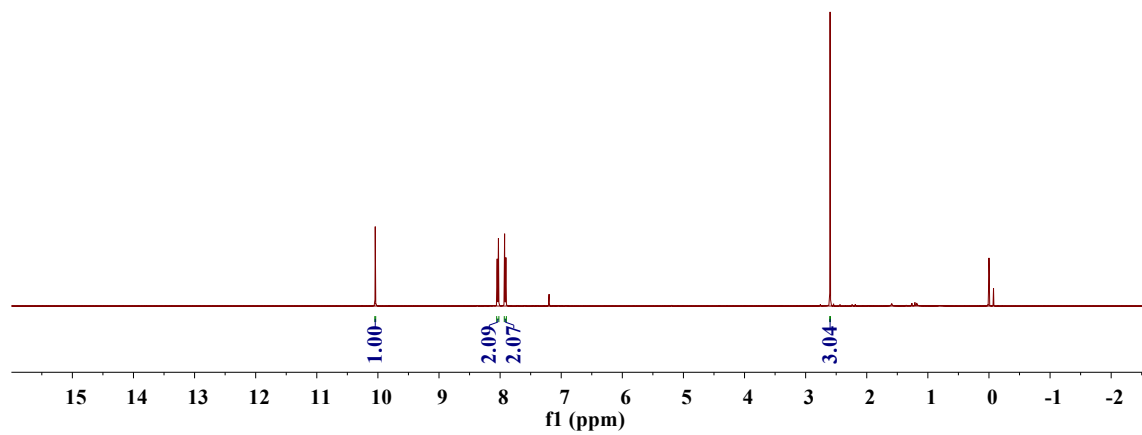

LG-1  
LG-1

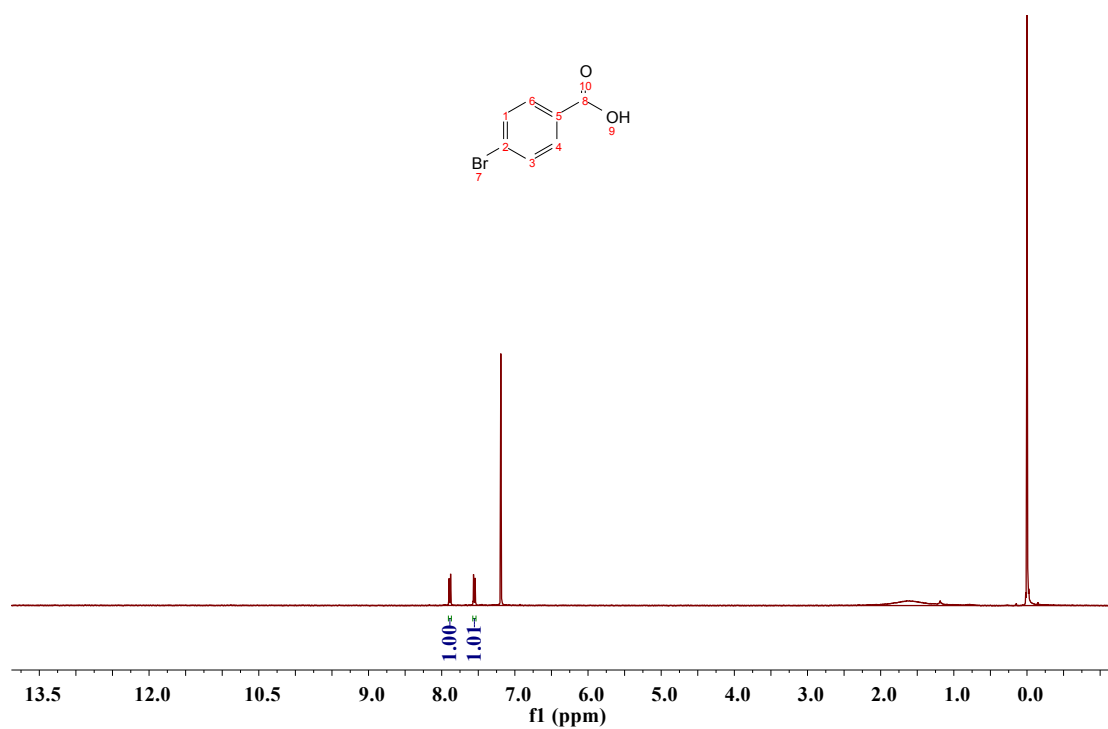

LG-2  
LG-2

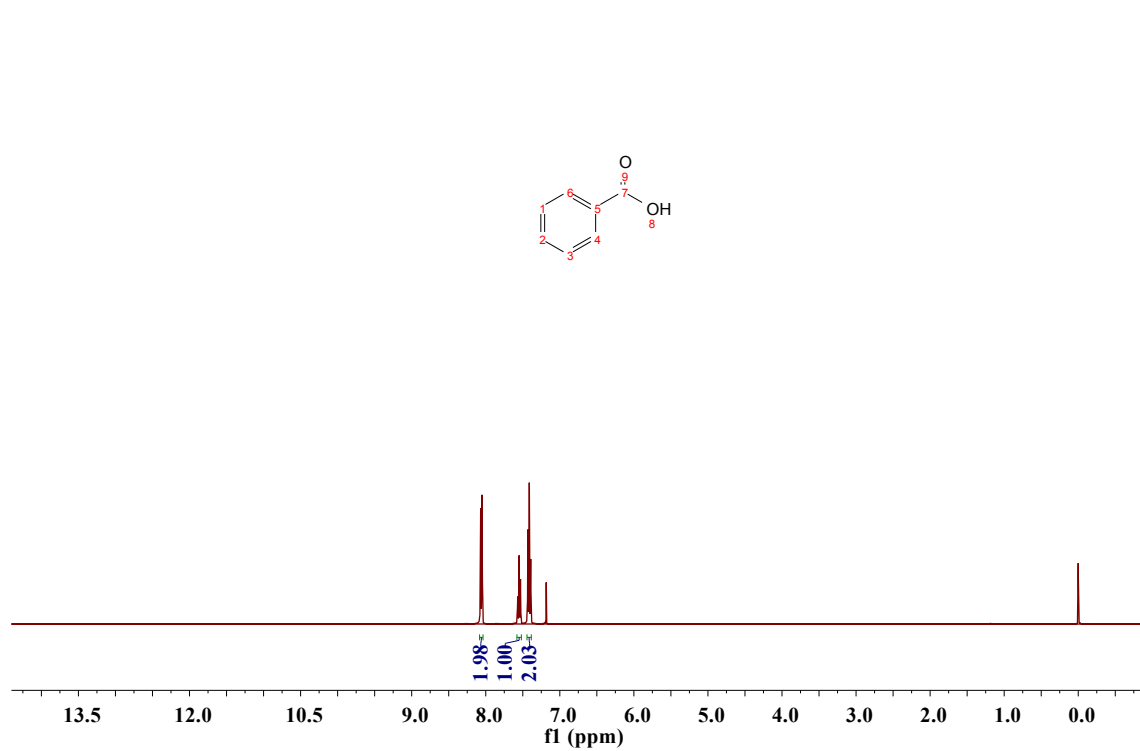

LG-3  
LG-3

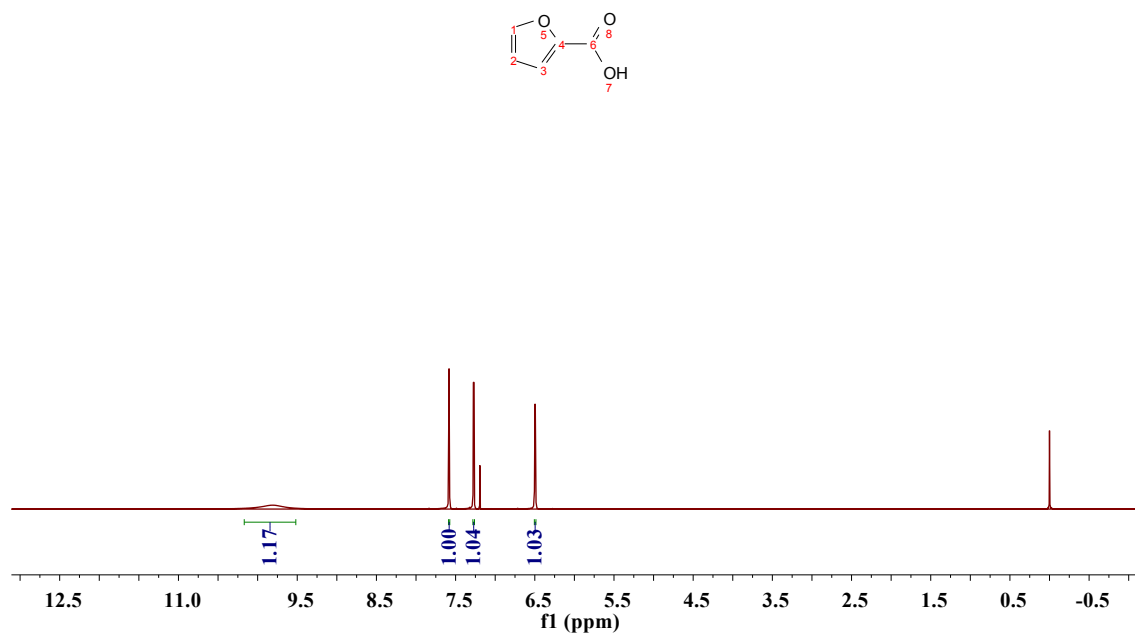

LG-4  
LG-4

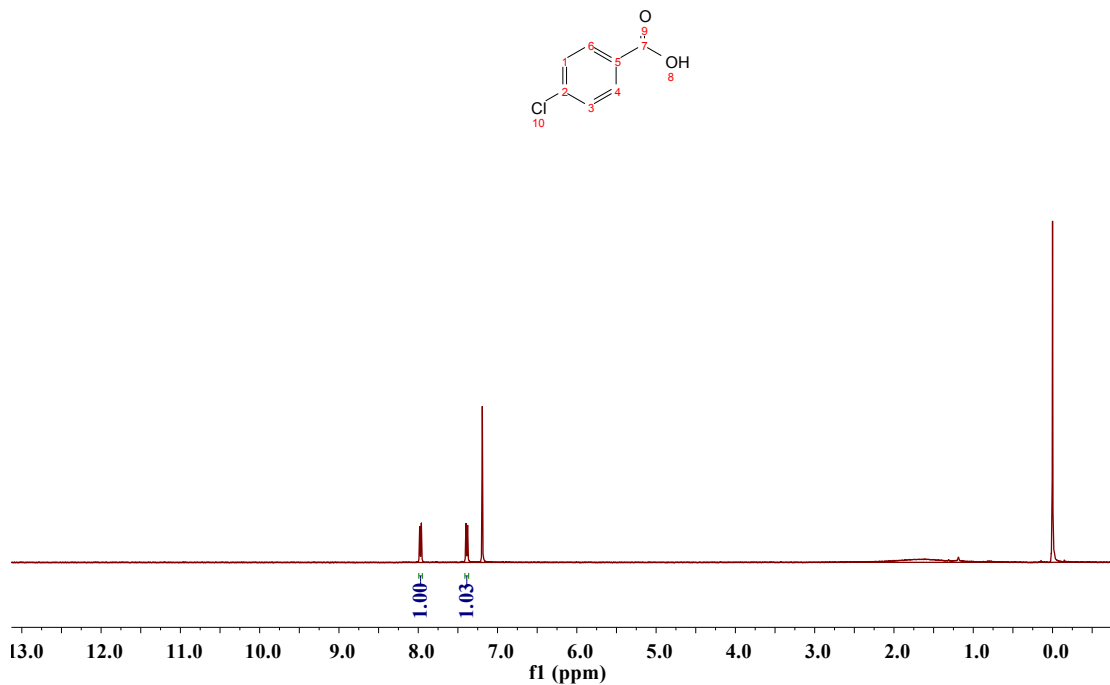

LG-6  
LG-6

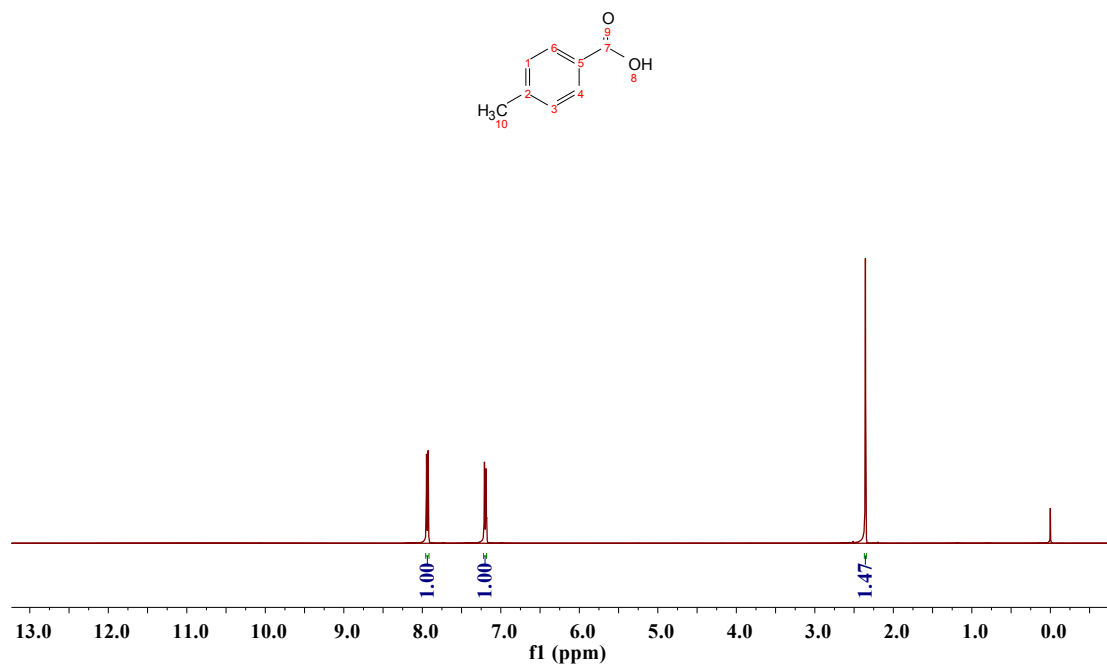

LG-7  
LG-7

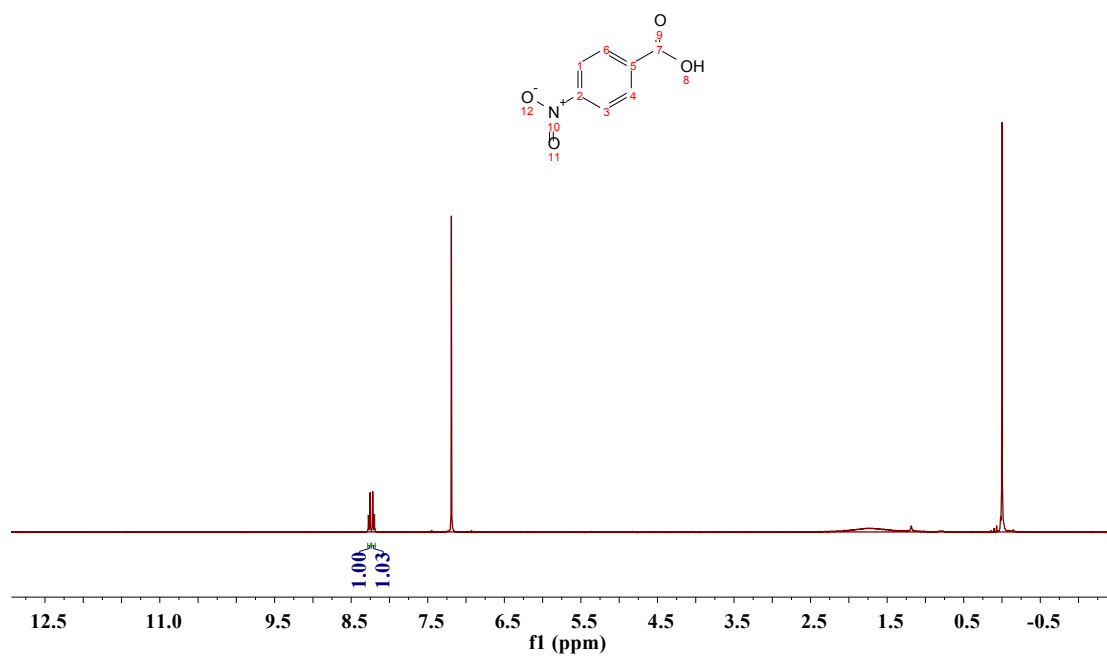

## 7, References

- [1] M. M. Hossain, S.-G. Shyu, *Advanced Synthesis & Catalysis* **2010**, 352, 3061-3068.
- [2] M. Iinuma, K. Moriyama, H. Togo, *Tetrahedron* **2013**, 69, 2961-2970.
- [3] X. Wang, D. Z. Wang, *Tetrahedron* **2011**, 67, 3406-3411.
- [4] K. Layek, H. Maheswaran, R. Arundhathi, M. L. Kantam, S. K. Bhargava, *Advanced Synthesis & Catalysis* **2011**, 353, 606-616.
- [5] C. B. Tripathi, S. Mukherjee, *Journal of Organic Chemistry* **2012**, 77, 1592-1598.
